# Supplementary material for: Association between demographic factors and prognosis in urothelial carcinoma of the upper urinary tract: a systematic review and meta-analysis
Source: PubMed Central journal article supplement (PMC5352335; doi:10.18632/oncotarget.10708), 2016-07-19
Supplement: oncotarget-08-7464-s001.pdf [file oncotarget-08-7464-s001.pdf]

# Association between demographic factors and prognosis in urothelial carcinoma of the upper urinary tract: a systematic review and meta-analysis

## Supplementary Materials

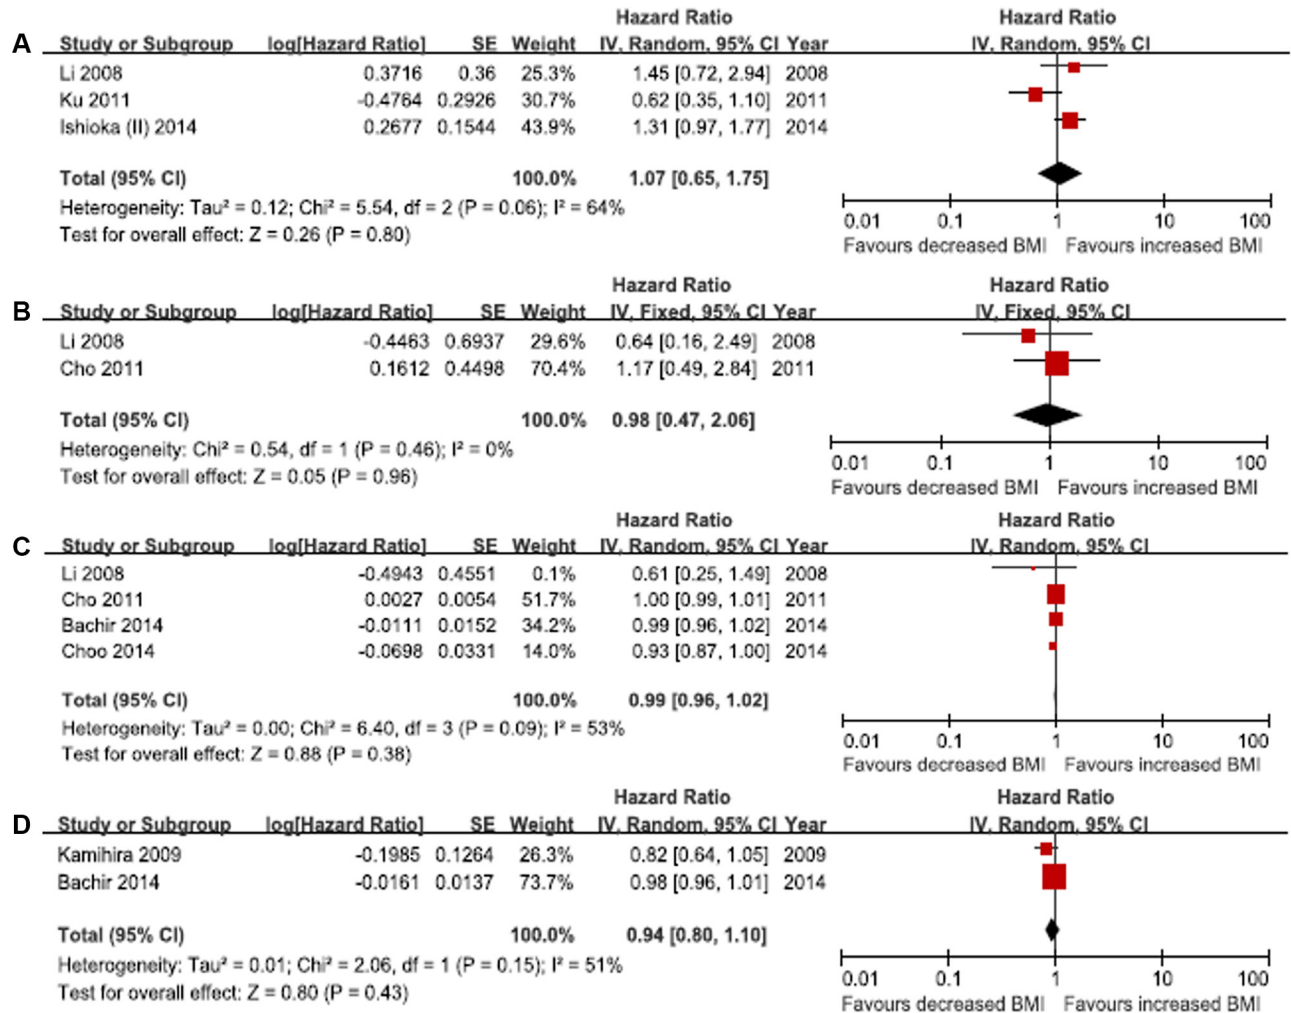

**Supplementary Figure S1: Forest plots of prognosis of obesity.** (A) Intravesical recurrence-free survival, (B) Progression-free survival, (C) Cancer-specific survival, (D) Overall survival.

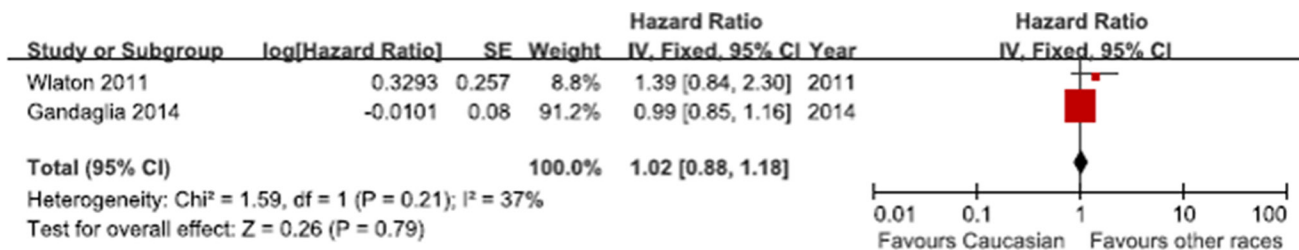

**Supplementary Figure S2: Forest plots of cancer-specific survival of race.**

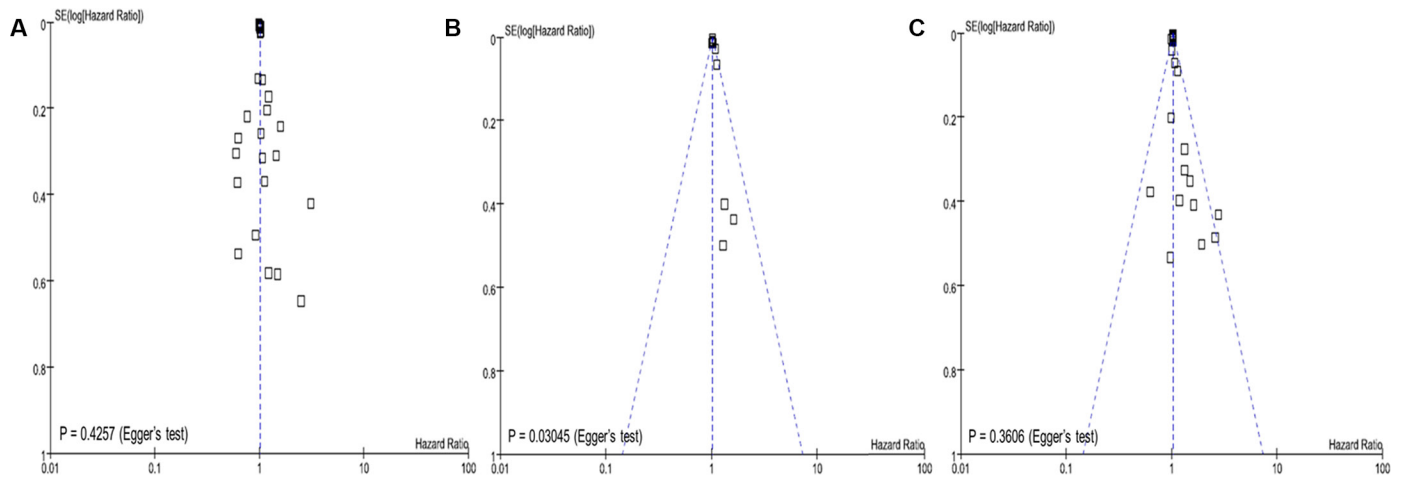

**Supplementary Figure S3: Funnel graphs of the assessment of potential publication bias of age.** (A) Intravesical recurrence-free survival, (B) Progression-free survival, (C) Cancer-specific survival.

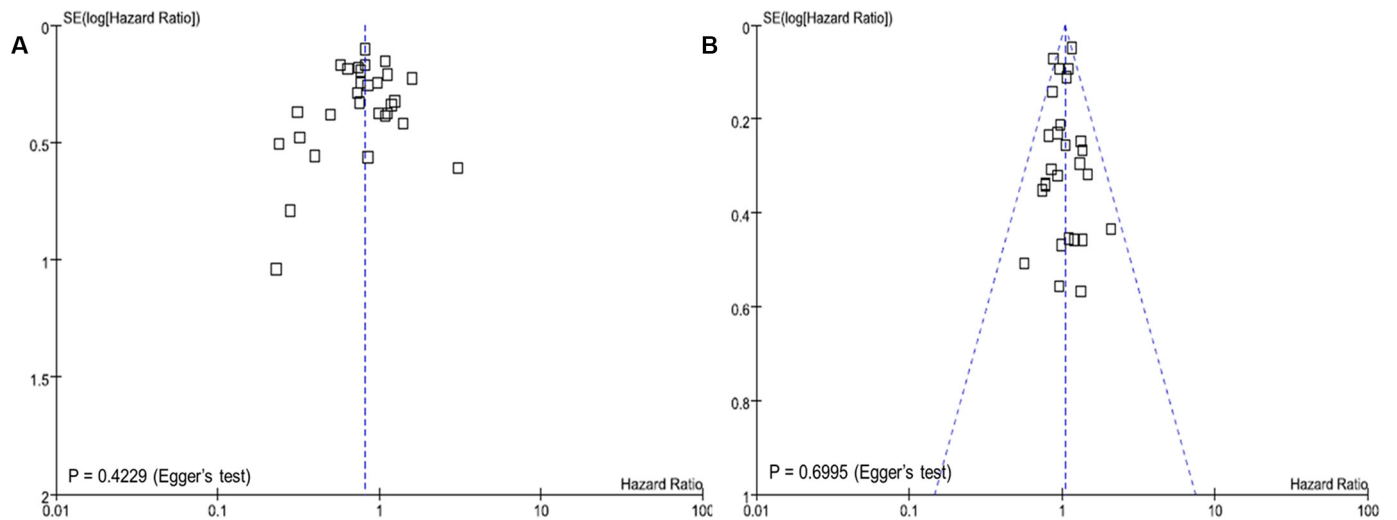

**Supplementary Figure S4: Funnel graphs of the assessment of potential publication bias of sex.** (A) Intravesical recurrence-free survival, (B) Cancer-specific survival.

**Supplementary Table S1: Pathologic characteristics of the eligible studies.** See Supplementary Table\_S1
